# Supplementary material
Source: Royal Society of Chemistry journal article supplement (doi:10.1039/d6ta00785f)
Supplement: d6ta00785f1.pdf [file d6ta00785f1.pdf]

Supplementary Information

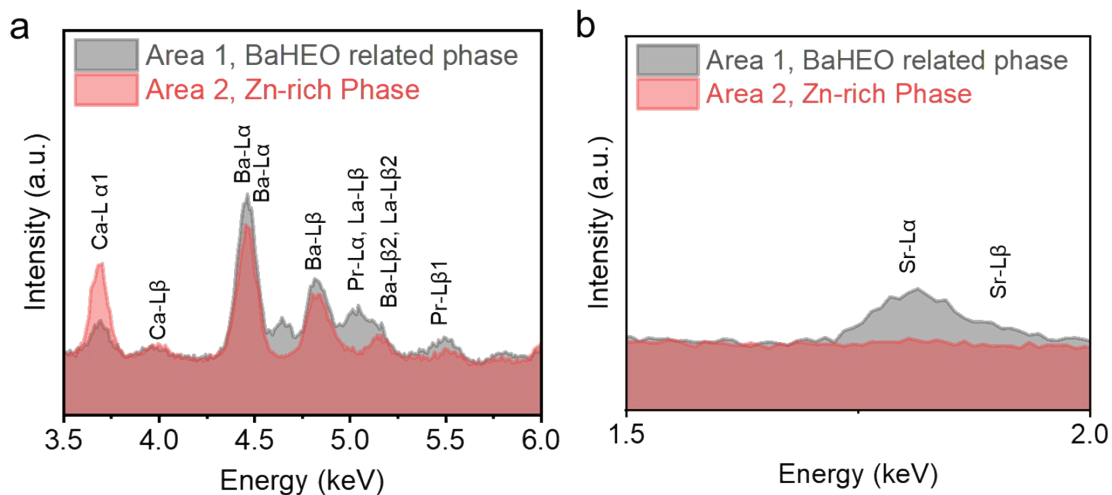

Fig S1. TEM-EDS survey scans of selected areas from the BaHEOZndefi nanocomposite: (a) from 3.5 to 6 keV (b) 1.5 to 2.0 keV.

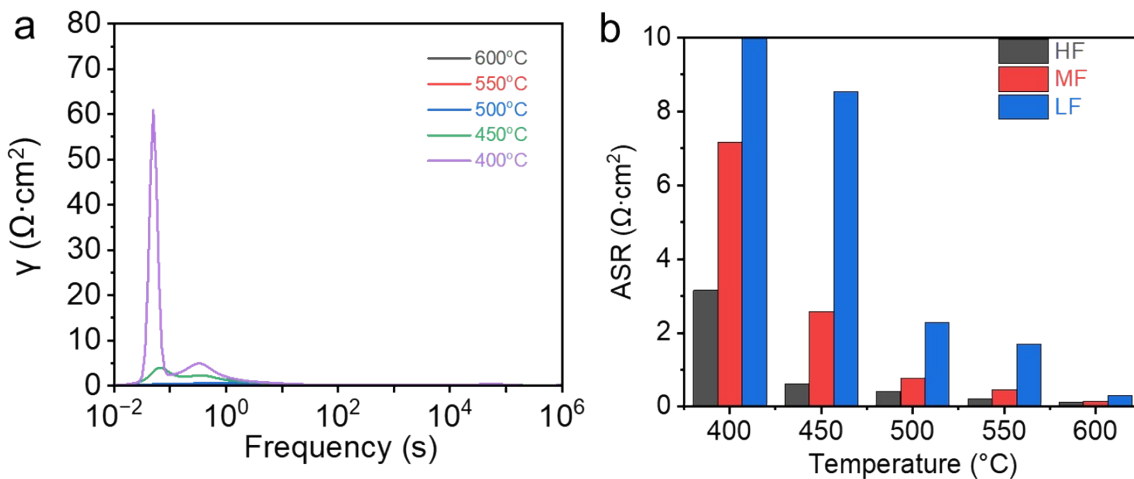

Fig S2. (a) DRT analysis of BaHEOZndefi symmetric cell from 400 to 600°C (b) ASR as function of temperature from 400 to 600°C for HF, MF and LF processes.

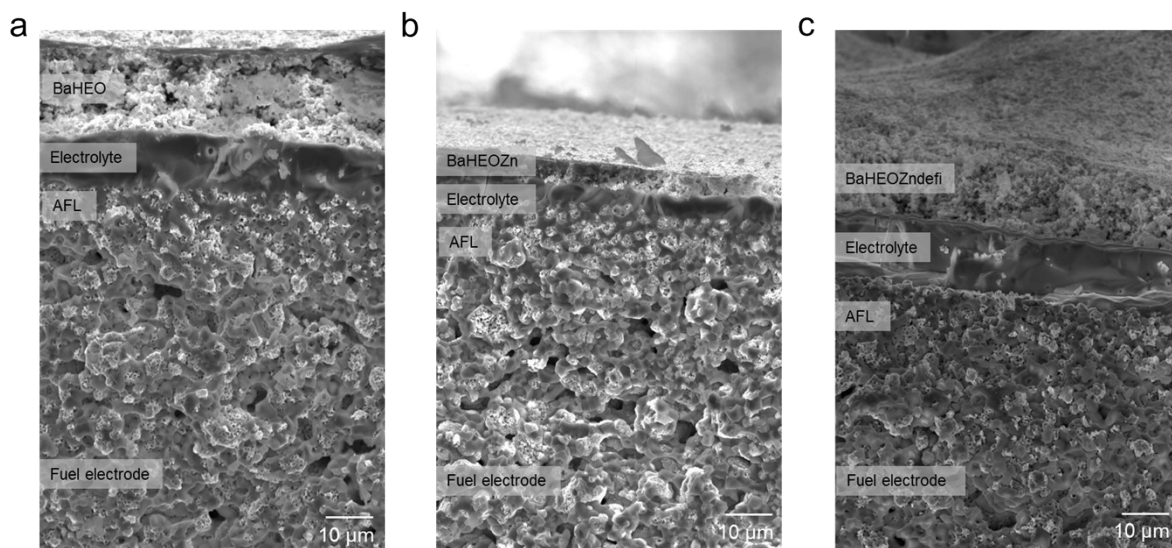

Fig S3. Cross-sectional image of PCC with (a) BaHfO<sub>3</sub> (b) BaHfO<sub>3</sub>Zn (c) BaHfO<sub>3</sub>Zn-deficient

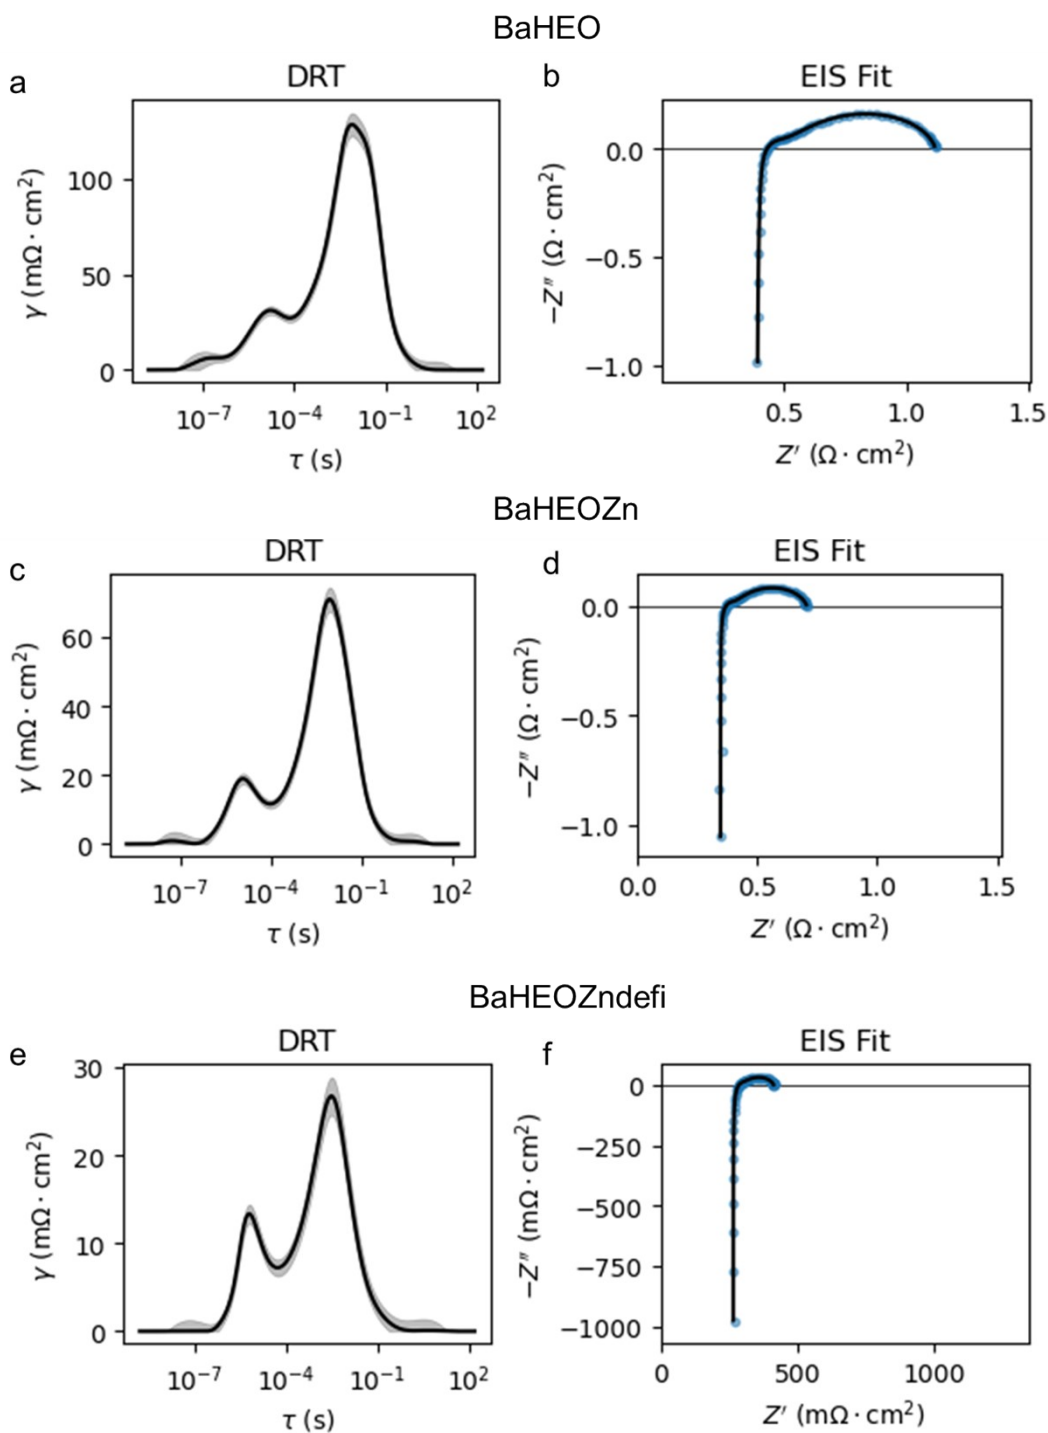

Fig S4. EIS analysis of PCC button cells with various air electrodes (BaHEO, BaHEOZn, and BaHEOZndefi) (a) DRT spectrum of BaHEO (b) equivalent circuit fitting results for BaHEO. Blue dots are experimental data and the black line is the model fit (c) DRT spectrum of BaHEOZn (d) EIS fitting results for BaHEOZn (e) DRT spectrum for BaHEOZndefi (f) EIS fitting results for BaHEOZndefi

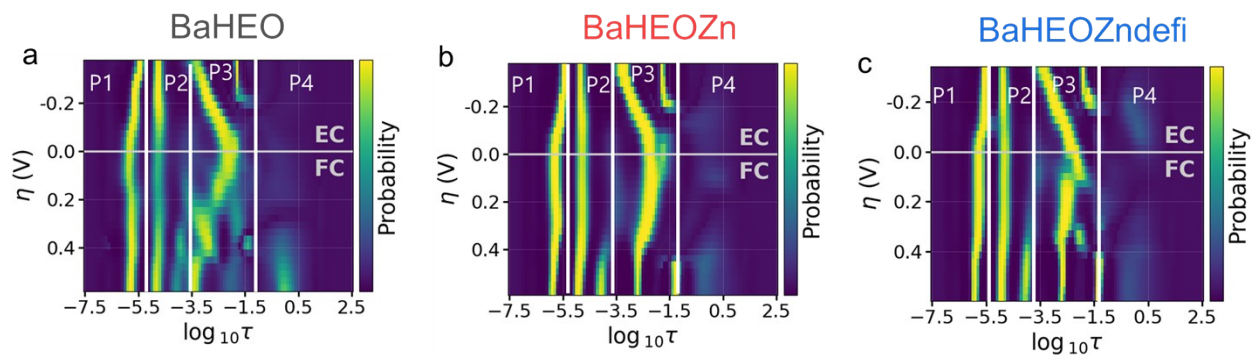

Fig S5. DRT peak probability plot as function of log time constant and overpotential. Yellow color indicates high likelihood of a “true” DRT peak. Based on the probability map, we divided the DRT distributions for each air electrode into 4 major peak regions or relaxation response regions: P1, P2, P3, and P4. (a) BaHEO (b) BaHEOZn (c) BaHEOZndefi

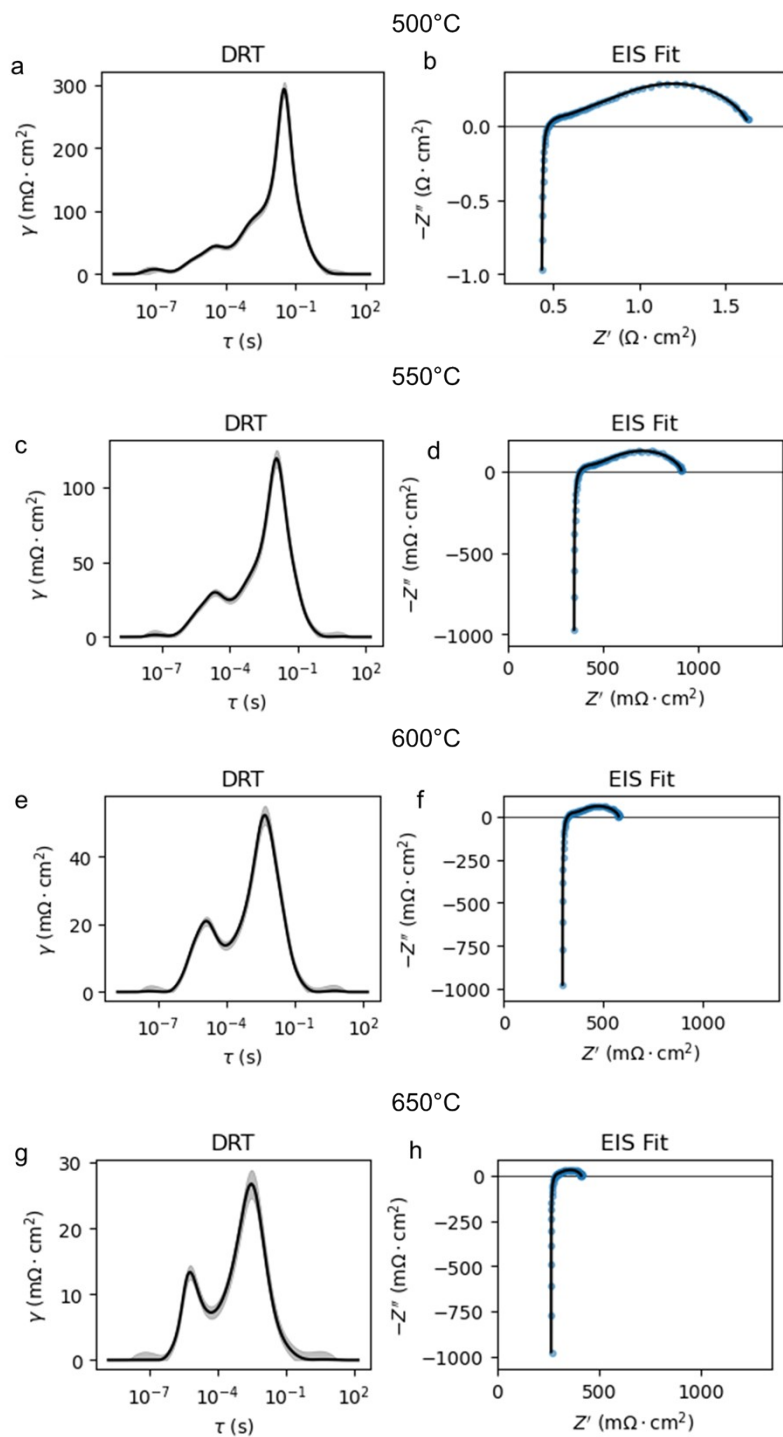

Fig S6. EIS analysis of PCC button cell with BaHEOZn<sub>defi</sub> air electrode at 500, 550, 600 and 650°C (a) DRT spectrum at 500°C (b) corresponding EIS model fit at 500°C (c) DRT spectrum at 550°C (d) corresponding EIS model fit at 550°C (e) DRT spectrum at 600°C (f) corresponding EIS model fit at 600°C (g) DRT spectrum at 650°C (h) corresponding EIS model fit at 650°C

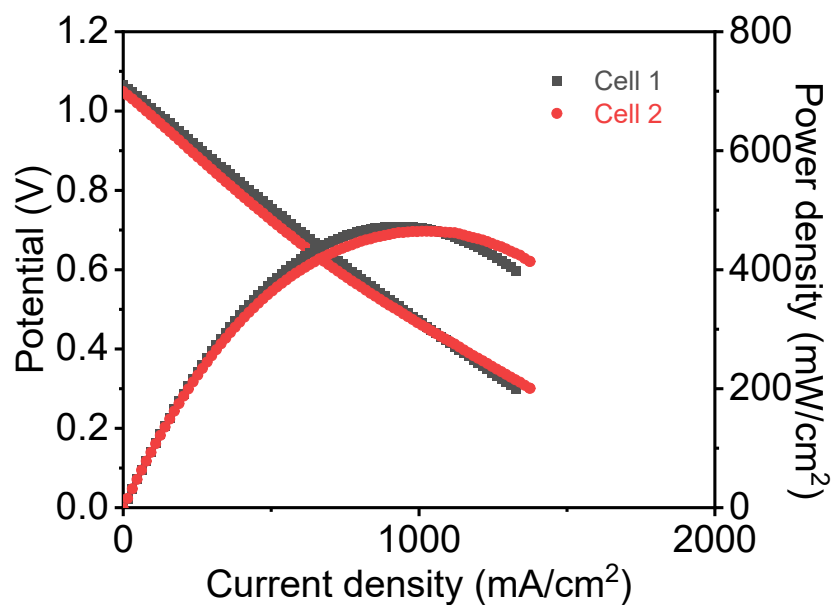

Fig S7. Reproducibility of duplicated BaHEOZndefi PCCs at 600°C. Cell 1 was used for performance measurement and durability testing under fuel cell mode. Cell 2 (~3X larger active area) was used for durability testing under electrolysis mode.

Table S1. EIS model fitting parameters for PCC button cells with various air electrodes (BaHEO, BaHEOZn, and BaHEOZndefi) at 600°C.  $R_0$  = ohmic resistance,  $L_0$  = inductance,  $R_x\_HN_x$  = resistance for each electrochemical process,  $\text{Ln}(\tau)\_HN_x$  = value of natural logarithm of time constant of specific electrochemical process,  $\alpha$  = distribution skew,  $\beta$  = distribution width

|                    | <b>BaHEO</b> | <b>BaHEOZn</b> | <b>BaHEOZndefi</b> |
|--------------------|--------------|----------------|--------------------|
| $R_0$              | 0.375        | 0.343          | 0.294              |
| $L_0$              | -15.657      | -15.597        | -15.675            |
| $R_{1\_HN_1}$      | 0.012        | 0.046          | 0.012              |
| $\ln(\tau)_{HN_1}$ | -15.693      | -11.393        | -12.881            |
| $\alpha_{HN_1}$    | 0.724        | 1              | 1                  |
| $\beta_{HN_1}$     | 0.773        | 0.759          | 0.946              |
| $R_{2\_HN_2}$      | 0.087        | 0.228          | 0.043              |
| $\ln(\tau)_{HN_2}$ | -11.181      | -4.724         | -11.188            |
| $\alpha_{HN_2}$    | 0.892        | 0.594          | 1                  |
| $\beta_{HN_2}$     | 0.675        | 0.795          | 0.825              |
| $R_{3\_HN_3}$      | 0.413        | 0.085          | 0.038              |
| $\ln(\tau)_{HN_3}$ | -4.88        | -3.188         | -8.088             |
| $\alpha_{HN_3}$    | 0.544        | 0.902          | 0.874              |
| $\beta_{HN_3}$     | 0.789        | 0.845          | 0.695              |
| $R_{4\_HN_4}$      | 0.230        |                | 0.138              |
| $\ln(\tau)_{HN_4}$ | -3.41        |                | -5.336             |
| $\alpha_{HN_4}$    | 0.976        |                | 0.727              |
| $\beta_{HN_4}$     | 0.796        |                | 0.833              |
| $R_{5\_HN_5}$      |              |                | 0.050              |
| $\ln(\tau)_{HN_5}$ |              |                | -3.66              |
| $\alpha_{HN_5}$    |              |                | 0.936              |
| $\beta_{HN_5}$     |              |                | 0.874              |

Table S2. EIS model fitting parameters for PCC button cell with BaHfO<sub>3</sub>ZrO<sub>2</sub> air electrode at 500, 550, 600 and 650°C.  $R_0$  = ohmic resistance,  $L_0$  = inductance,  $R_{x\_HN_x}$  = resistance for each electrochemical process,  $\ln(\tau)_{HN_x}$  = value of natural logarithm of time constant of specific electrochemical process,  $\alpha$  = distribution skew,  $\beta$  = distribution width

|                    | <b>500°C</b> | <b>550°C</b> | <b>600°C</b> | <b>650°C</b> |
|--------------------|--------------|--------------|--------------|--------------|
| $R_0$              | 0.427        | 0.347        | 0.294        | 0.264        |
| $L_0$              | -15.679      | -15.676      | -15.657      | -15.678      |
| $R_{1\_HN_1}$      | 0.159        | 0.021        | 0.013        | 0.025        |
| $\ln(\tau)_{HN_1}$ | -10.701      | -12.665      | -12.817      | -11.843      |
| $\alpha_{HN_1}$    | 1            | 1            | 1            | 1            |
| $\beta_{HN_1}$     | 0.586        | 0.85         | 0.946        | 0.837        |
| $R_{2\_HN_2}$      | 0.262        | 0.064        | 0.041        | 0.124        |
| $\ln(\tau)_{HN_2}$ | -6.274       | -10.725      | -11.185      | -5.249       |
| $\alpha_{HN_2}$    | 0.816        | 1            | 1            | 0.605        |
| $\beta_{HN_2}$     | 0.662        | 0.765        | 0.825        | 0.708        |
| $R_{3\_HN_3}$      | 0.794        | 0.162        | 0.039        |              |
| $\ln(\tau)_{HN_3}$ | -3.336       | -6.492       | -8.082       |              |
| $\alpha_{HN_3}$    | 0.972        | 0.682        | 0.875        |              |
| $\beta_{HN_3}$     | 0.735        | 0.716        | 0.697        |              |
| $R_{4\_HN_4}$      |              | 0.232        | 0.132        |              |
| $\ln(\tau)_{HN_4}$ |              | -4.561       | -5.363       |              |
| $\alpha_{HN_4}$    |              | 0.969        | 0.728        |              |
| $\beta_{HN_4}$     |              | 0.843        | 0.837        |              |
| $R_{5\_HN_5}$      |              | 0.087        | 0.058        |              |
| $\ln(\tau)_{HN_5}$ |              | -2.759       | -3.66        |              |
| $\alpha_{HN_5}$    |              | 0.888        | 0.936        |              |
| $\beta_{HN_5}$     |              | 0.871518     | 0.874726     |              |
